# Supplementary material
Source: publisher figshare collection journal article supplement (https://rs.figshare.com/ndownloader/files/17565137)
Supplement: Supplementary file 1 [file 17565137]

## Sheet: Sheet1
Supplementary Table 3: Biogeographic coding of 188 ingroup Coraciiform species, four outgroup species, and nine fossil species. An "X" indicates that the species is present. Areas used to infer historical biogeography using BioGeoBears: A) North America; B) Caribbean islands, including Trinidad; C) South America; D) Palearctic, including arid Northern Africa; E) Tropical Africa and Madagascar; F)…
Taxon	Nearctic	Carribean	South America	Palearctic	Africa and Madagascar	Indomalaya	Philippines and Wallacea	Australia and New Guinea	Oceania
Leptosomus discolor					X
Buceros rhinoceros					X	X	X	X	X
Apaloderma vittatum		X	X		X	X	X
Picoides pubescens	X	X	X	X	X	X
Atelornis crossleyi					X
Atelornis pittoides					X
Brachypteracias leptosomus					X
Geobiastes squamiger					X
Uratelornis chimaera					X
Coracias abyssinicus					X
Coracias benghalensis				X		X
Coracias caudatus					X
Coracias cyanogaster					X
Coracias garrulus				X
Coracias naevius					X
Coracias spatulatus					X
Coracias temminckii							X
Eurystomus azureus							X
Eurystomus glaucurus					X
Eurystomus gularis					X
Eurystomus orientalis						X	X	X	X
Meropogon forsteni							X
Merops albicollis					X
Merops apiaster				X	X
Merops boehmi					X
Merops breweri					X
Merops bullockoides					X
Merops bulocki					X
Merops gularis					X
Merops hirundineus					X
Merops leschenaulti						X
Merops malimbicus					X
Merops mentalis					X
Merops muelleri					X
Merops nubicoides					X
Merops nubicus					X
Merops oreobates					X
Merops orientalis				X	X	X
Merops ornatus								X
Merops persicus				X	X
Merops philippinus						X	X	X	X
Merops pusillus					X
Merops revoilii					X
Merops superciliosus					X
Merops variegatus					X
Merops viridis						X
Merops viridis americanus							X
Nyctyornis amictus						X
Nyctyornis athertoni						X
Todus angustirostris		X
Todus mexicanus		X
Todus multicolor		X
Todus subulatus		X
Todus todus		X
Aspatha gularis	X
Baryphthengus martii	X		X
Baryphthengus ruficapillus			X
Electron carinatum			X
Electron platyrhynchum			X
Eumomota superciliosa	X
Hylomanes momotula	X
Momotus aequatorialis			X
Momotus bahamensis		X
Momotus coeruliceps	X
Momotus lessonii	X
Momotus mexicanus	X
Momotus momota			X
Momotus m. microstephanus			X
Momotus subrufescens			X
Alcedo atthis				X		X	X	X	X
Alcedo coerulescens						X	X
Alcedo euryzona						X
Alcedo hercules						X
Alcedo meninting						X	X
Alcedo quadribrachys					X
Alcedo semitorquata					X
Ceyx argentatus							X
Ceyx azureus							X	X
Ceyx cajeli							X
Ceyx collectoris									X
Ceyx cyanopectus							X
Ceyx dispar									X
Ceyx erithaca						X	X
Ceyx fallax							X
Ceyx flumenicola							X
Ceyx gentianus									X
Ceyx lepidus							X
Ceyx malaitae									X
Ceyx margarethae							X
Ceyx meeki									X
Ceyx melanurus							X
Ceyx mindanensis							X
Ceyx mulcatus									X
Ceyx nigromaxilla									X
Ceyx pallidus									X
Ceyx pusillus							X	X	X
Ceyx sacerdotis									X
Ceyx samarensis							X
Ceyx solitarius								X
Ceyx uropygialis							X
Ceyx wallacii							X
Ceyx websteri									X
Corythornis cristatus					X
Corythornis leucogaster					X
Corythornis madagascariensis					X
Corythornis vintsioides					X
Ispidina lecontei					X
Ispidina picta					X
Chloroceryle aenea	X	X	X
Chloroceryle amazona	X	X	X
Chloroceryle americana	X	X	X
Chloroceryle inda	X		X
Ceryle rudis				X	X	X
Megaceryle alcyon	X
Megaceryle lugubris				X		X
Megaceryle maxima					X
Megaceryle torquata	X	X	X
Actenoides bougainvillei									X
Actenoides capucinus							X
Actenoides concretus						X
Actenoides excelsus									X
Actenoides hombroni							X
Actenoides lindsayi							X
Actenoides monachus							X
Actenoides princeps							X
Cittura cyanotis							X
Cittura sanghirensis							X
Clytoceyx rex								X
Caridonax fulgidus							X
Dacelo gaudichaud								X
Dacelo leachii								X
Dacelo novaeguineae								X
Dacelo tyro								X
Halcyon albiventris					X
Halcyon badia					X
Halcyon chelicuti					X
Halcyon coromanda				X		X	X
Halcyon cyanoventris						X
Halcyon gularis							X
Halcyon leucocephala					X
Halcyon malimbica					X
Halcyon pileata				X		X
Halcyon senegalensis					X
Halcyon senegaloides					X
Halcyon smyrnensis				X		X
Lacedo pulchella						X
Melidora macrorrhina								X
Pelargopsis amauroptera						X
Pelargopsis capensis						X	X
Pelargopsis melanorhyncha							X
Syma megarhyncha								X
Syma torotoro								X
Tanysiptera carolinae								X
Tanysiptera danae								X
Tanysiptera ellioti							X
Tanysiptera galatea							X	X
Tanysiptera hydrocharis								X
Tanysiptera nigriceps									X
Tanysiptera nympha								X
Tanysiptera riedelii								X
Tanysiptera sylvia								X
Todiramphus albicilla									X
Todiramphus albonotatus									X
Todiramphus australasia							X
Todiramphus chloris					X	X	X
Todiramphus cinnamominus									X
Todiramphus colonus								X
Todiramphus diops							X
Todiramphus enigma							X
Todiramphus farquhari									X
Todiramphus funebris							X
Todiramphus gertrudae									X
Todiramphus godeffroyi									X
Todiramphus lazuli							X
Todiramphus leucopygius									X
Todiramphus macleayii								X
Todiramphus nigrocyaneus								X
Todiramphus pelewensis									X
Todiramphus pyrrhopygius								X
Todiramphus recurvirostris									X
Todiramphus reichenbachii									X
Todiramphus ruficollaris									X
Todiramphus sacer									X
Todiramphus sacer manuae									X
Todiramphus sacer pealei									X
Todiramphus sanctus								X	X
Todiramphus saurophagus								X	X
Todiramphus sordidus							X
Todiramphus tristrami									X
Todiramphus tutus									X
Todiramphus veneratus									X
Todiramphus winchelli							X
Fossils										Authority
Plesiocathartes	X			X						Mayr 2002; Weidig 2006
Primotrogon	X			X						Kristoffersen 2002; Weidig 2003; Mayr 2009b
Messelirrisor				X						Mayr 2000
Septencoracias				X						Bourdon et al. 2016
Primobucco	X			X						Mayr et al. 2004; Ksepka & Clarke 2010
Paracoracias	X									Clarke et al. 2009
Miocoracias				X						Mourer-Chauviré et al. 2013
Palaeotodus	X			X						Mourer-Chauviré 1985; Mayr and Kopf 2007
Fossil-motmot	X									Becker 1986
